1

2 Eco-evolutionary dynamics of prior selfing rate promotes the  
3 coexistence without niche partitioning under reproductive  
4 interference

5

6

7 Running head: coexistence promoted by the evolution of selfing

8

9

10 Koki R. Katsuhara<sup>1\*</sup>, Yuuya Tachiki<sup>2</sup>, Ryosuke Iritani<sup>3</sup> and Atushi  
11 Ushimaru<sup>1</sup>

12 <sup>1</sup> Graduate School of Human Development and Environment, Kobe University, Kobe,

13 Japan;

14 <sup>2</sup> Department of Biological Sciences, Tokyo Metropolitan University, Tokyo, Japan;

15 <sup>3</sup> RIKEN Interdisciplinary Theoretical and Mathematical Sciences (iTHEMS), Wako,

16 Japan.

17

18 \* Corresponding author: [k.katsuhara0228@gmail.com](mailto:k.katsuhara0228@gmail.com)

19

20

21 **Abstract**

22 **1.** When the two or more plants species share the same pollinators, pollinator-mediated  
23 reproductive interference make coexistence difficult. Recent studies suggested prior  
24 autonomous selfing mitigate reproductive interference, could enabling coexistence  
25 without pollination niche partitioning (pre-emptive selfing hypothesis). However, there  
26 are no studies to test whether evolution of prior selfing promote the coexistence,  
27 considering eco-evolutionary dynamics of population size, selfing rate and inbreeding  
28 depression.

29 **2.** To examine conditions that the evolution of prior selfing promote coexistence under  
30 mutual reproductive interference especially in the point of view for pollinator  
31 availability and dynamics of inbreeding depression, we constructed individual-based  
32 model in which two plant species compete against each other in the form of mutual  
33 reproductive interference and can evolve prior autonomous selfing rate. We expected  
34 that purging of deleterious mutations could cause evolutionary rescue because inferior  
35 species could rescue population density through the evolution of prior selfing if the  
36 strength of inbreeding depression decreases with an increase of population's selfing rate.

37 **3.** Our simulation demonstrated that the evolution of prior selfing could promote the  
38 coexistence while reproductive interference caused competitive exclusion without  
39 evolution. We found that lower pollinator availability tended to prefer rapid  
40 evolutionary shift to higher prior selfing rate, it neutralizes the negative effect of  
41 reproductive interference, and population dynamics exhibit neutral random walk in both  
42 species. When the strength of inbreeding depression decreased with an increase in  
43 population's selfing rate, moderate pollinator availability resulted in long-term  
44 coexistence in which relative-abundance-dependent selection on the prior selfing rate

45 rescue population density of inferior species intermittently.

46 **4. Synthesis.** We showed that the evolution of prior selfing could increase population  
47 growth rate of inferior species and consequently enable the long-term coexistence with  
48 evolutionary rescue. This is the new mechanisms explaining co-evolutionary  
49 coexistence of closely related plant species without niche partitioning and consistent  
50 with recent studies reported that closely related mixed-mating species are sympatrically  
51 growing even under the mutual reproductive interference.

52

53 **Key-words:** co-evolution, evolutionary rescue, inbreeding depression, individual based  
54 model, mixed mating, pollinator-mediated competition, selfing syndrome

55

56

## 57 **Introduction**

58 Clarifying the conditions under which competing species can coexist is a traditional and  
59 most fundamental subject in ecology (May, 1974; Chesson, 2000). Numerous empirical  
60 and theoretical works have shown that niche partitioning between competing species is  
61 required for their coexistence: i.e. the intraspecific competition should be larger than  
62 interspecific competition (Chesson, 2000; Silvertown, 2004). Closely related species,  
63 which potentially share the same or very similar resources and reproductive habits, are  
64 therefore expected to heavily compete against each other, likely being unable to coexist  
65 (Gröning & Hochkirch, 2008; Burns & Straus, 2011; Whitton, Sears & Maddison;  
66 2017).

67 In flowering plants, when two or more plant species depend on the same  
68 pollinators for reproduction, interspecific pollinator-mediated pollen transfer can cause

69 strong reproductive interference that results in competitive exclusion of either species or  
70 niche partitioning between species (Levin & Anderson, 1970; Takakura, Nishida,  
71 Matsumoto & Nishida, 2008; Runquist & Stanton, 2013; Moreira-Hernández &  
72 Muchhala, 2019). Reproductive interference via interspecific pollen transfer can occur  
73 when both or either of increase in heterospecific pollen deposition on the stigma and  
74 conspecific pollen loss on heterospecific flower (Mitchell, Flanagan, Brown, Waser &  
75 Karron, 2009; Morales & Traveset, 2008). Specifically, Pollen deposition from closely  
76 related heterospecies is known to strongly decrease female reproductive success owing  
77 to pollen tube growth competition in the style, ovule discounting and/or hybridization  
78 (Harder, Cruzan & Thomson, 1993; Nishida, Kanaoka, Hashimoto, Takakura & Nishida,  
79 2014; Whitton et al., 2017). Thus, reproductive interference via heterospecific pollen  
80 deposition may favour spatiotemporal segregation in flowering or floral trait  
81 displacement, with a consequence that they use different, or different body parts of the  
82 same, pollinator species (e.g. Runquist 2012; van der Niet & Johnson 2012; Huang &  
83 Shi, 2013).

84 Selfing has gathered much recent attention as an alternative mechanism that  
85 can mitigate reproductive interference by heterospecific pollen transfer from competing  
86 relatives (Fishman & Wyatt, 1999; de Waal, Anderson & Ellis, 2015; Katsuhara &  
87 Ushimaru, 2019). Recent studies have suggested that selfing constitutes a reproductive  
88 barrier among sympatrically coexisting related species (Fishman & Wyatt, 1999; Martin  
89 & Willis, 2007; Goodwillie & Ness 2013; Brys, van Cauwenberghe & Jacquemyn, 2016).  
90 Selfers with small and inconspicuous flower (selfing syndrome) which therefore  
91 receives fewer pollinator visits are likely to coexist with outcrossing relatives (Sicard &  
92 Lenhard, 2011; Kalisz et al., 2012). Thus, reduced heterospecific pollen deposition

93 owing to fewer visits and/or reproductive assurance via self-pollination might mitigate  
94 the negative effect of reproductive interference in selfers, although it is difficult to  
95 clarify their relative importance in general (Fishman & Wyatt, 1999; Martin & Willis,  
96 2007; de Waal et al., 2015; Brys et al., 2016).

97         Recent studies further hypothesize that “prior” rather than “delayed”  
98 autonomous selfing can mitigate the negative effect of reproductive interference via  
99 interspecific pollen transfer and promote species coexistence independent of the  
100 presence of pollinator visitations (the pre-emptive selfing hypothesis; Randle, Spigler &  
101 Kalisz, 2018; Katsuhara & Ushimaru, 2019). Theoretical and empirical studies have  
102 suggested that prior selfing unlikely evolves with frequent pollinator visitations (Lloyd,  
103 1992; Kalisz, Vogler & Hanley, 2004; Eckert et al., 2010). However, in the presence of  
104 reproductive interference by an abundant competitor species, frequent pollinator  
105 visitations largely reduce outcrossing success of an inferior species. In such a situation,  
106 the evolution of prior selfing can mitigate the negative effect of reproductive  
107 interference from the competitor and would rescue the inferior species from competitive  
108 exclusion.

109         The pre-emptive selfing hypothesis should be tested in the context of eco-  
110 evolutionary dynamics of population size, selfing rate and inbreeding depression.  
111 Because the negative effect of reproductive interference that decreases outcrossing  
112 success becomes greater with an increase in the relative abundance of competing  
113 species (Levin & Anderson, 1970; Katsuhara & Ushimaru, 2019), population dynamics  
114 of mutually competing species should be an important driving factor of the evolution of  
115 prior autonomous selfing of a given species. The evolution of prior selfing could rescue  
116 the population density of competitively inferior species via mitigation of reproductive

117 interference while it could also result in self-extinction due to the negative effect of  
118 inbreeding depression on population growth rate depends on the strength of inbreeding  
119 depression (Cheptou, 2019; Katsuhara & Ushimaru, 2019). Therefore, dynamics of  
120 inbreeding depression is an important factor influencing the evolution of selfing because  
121 the strength of inbreeding depression is often expressed as a decreasing function of  
122 population's selfing rate due to "purging" of deleterious, recessive alleles (Schemske &  
123 Lande, 1985; Chaelesworth, Chaelesworth & Morgan, 1990; Lloyd, 1992; Husband &  
124 Schemske, 1996; Crnokrak & Barrett, 2002; Goodwillie, Kalisz & Eckert, 2005;  
125 Charlesworth & Willis, 2009). Thus, dynamics of population size, the degree of selfing  
126 rate and inbreeding depression of competing species are ideally considered to examine  
127 the adaptive significance of prior selfing under reproductive interferences. To the best of  
128 our knowledge, however, no studies have examined the eco-evolutionary dynamics of  
129 these variables, and therefore little is known about the possibility of coexistence under  
130 reproductive interference, followed by evolution of prior selfing.

131 In this study, to examine the pre-emptive selfing hypothesis, we constructed a  
132 model in which two plant species sharing the same pollination niche and can evolve  
133 prior autonomous selfing compete against each other in the form of mutual reproductive  
134 interference (i.e. eco-evolutionary dynamic model). Using the model, we addressed  
135 following questions. Can prior selfing evolve under mutual reproductive interference  
136 and promote their coexistence as an evolutionary rescue agent? Is inbreeding depression  
137 an important determinant for the joint dynamics of population size and selfing rate? By  
138 answering to these questions, we discuss the conditions in which the evolution of prior  
139 selfing promotes the long-term coexistence of closely related species sharing the same  
140 pollination niche.

141

## 142 **Model**

143 *Community structure, pollination, seed production and germination processes*

144 We develop an individual-based model of competition between two annual flowering  
145 plant species (species with discrete generation) within a site whose carrying capacity is  
146  $K$ :  $K$  individuals of both or either of species 1 (sp<sub>1</sub>) and 2 (sp<sub>2</sub>) lives in the site for each  
147 generation (default  $K$  value is 2,000). Here, the relative abundance of sp<sub>*i*</sub> at the  $t$ -th  
148 generation are denoted as  $q_{i,t}$  where  $i$  is either 1 or 2 and  $q_{1,t} + q_{2,t} = 1$  holds. Thus,  
149 the number of individuals of sp<sub>*i*</sub> equals  $K q_{i,t}$ . In the model, we assume that ecological  
150 niches of sp<sub>1</sub> and sp<sub>2</sub> completely overlap with each other, although the two species  
151 produce no hybrids.

152 First, we describe the pollination and fertilization processes in the model. Each  
153 individual of both species produces  $n$  ovules which are fertilized via prior autonomous  
154 selfing and outcrossing mediated by pollinators and  $g$  pollen grains. The  $j$ -th individual  
155 of sp<sub>*i*</sub> fertilizes their ovules via prior autonomous selfing at the rate of  $r_{i,j,t}$  in the  $t$ -th  
156 generation ( $1 \leq j \leq K q_{i,t}$  for  $i = 1$  or  $2$ ). Thus, an integral number of ovules obtained  
157 by rounding  $nr_{i,j,t}$  are fertilized via prior selfing and the others were remained for  
158 pollinator-mediated outcrossing. Here, we assumed that an integral number obtained by  
159 rounding proportion  $P$  ( $0 \leq P \leq 1$ ) of the  $n(1 - r_{i,j,t})$  ovules are pollinated with  
160 outcrossed conspecific and/or heterospecific pollen grains by pollinators. Using  $P < 1$ ,  
161 we can formulate pollinator limitation. Here, we assume that pollinators  
162 indiscriminately visit flowers of both species and carried their pollen in proportion to  
163 their relative flower abundances.

164 Pollen parent of each outcrossed ovule of individual  $j$  is randomly assigned to

165 conspecific with the probability of  $\frac{\sum_{j=1}^{Kq_{i,t}} g(1-r_{i,j,t})}{\sum_{j=1}^{Kq_{i,t}} g(1-r_{i,j,t}) + c_h \sum_{j=1}^{(1-q_{i,t})^K} g(1-r_{h,j,t})}$ ,

166 where  $c_h$ ,  $r_{i,j,t}$  and  $r_{h,j,t}$  ( $0 \leq c_h$ ,  $q_{i,t}$ ,  $r_{i,j,t}$  and  $r_{h,j,t} \leq 1$ ) are the strength of  
 167 reproductive interference from heterospecies ( $sp_h$ ) and the rates of prior selfing of the  $j$ -  
 168 th individuals of  $sp_i$  and  $sp_h$ , respectively. The parameter  $c_h$  is interpreted as the  
 169 competitive ability of a heterospecific pollen grain relative to that of a conspecific one  
 170 to get fertilization with individual  $j$ 's ovule. Besides, the probabilities of which pollen  
 171 grains of individual  $j$  fertilize conspecific and heterospecific ovules are described as

172  $\frac{g(1-r_{i,j,t})}{\sum_{j=1}^{Kq_{i,t}} g(1-r_{i,j,t}) + c_h \sum_{j=1}^{(1-q_{i,t})^K} g(1-r_{h,j,t})}$  and  $\frac{c_h g(1-r_{i,j,t})}{c_h \sum_{j=1}^{Kq_{i,t}} g(1-r_{i,j,t}) + \sum_{j=1}^{(1-q_{i,t})^K} g(1-r_{h,j,t})}$ ,

173 respectively. In this formulation, we assume that outcross pollen proportionally  
 174 decreases with the prior selfing rate in respective individuals of both species. This  
 175 assumption mimics increased pollen discounting and/or anther-stigma interference with  
 176 increasing the prior selfing rate (Lloyd and Webb, 1986; Webb and Lloyd, 1986;  
 177 Karron, Jackson, Thumser & Schlicht 1997; Fishman, 2000; Barrett 2002). Because we  
 178 assumed random pollination, it should be noted the ovule of  $j$ -th individual is fertilized  
 179 by pollen of  $j$ -th individual (pollinator-mediated self-pollination; geitonogamy) with the  
 180 above probability and they are treated as self-fertilized pollen as well as the ovules  
 181 fertilized by prior autonomous selfing.

182 Second, we denote the seed production process. We assume that only ovules  
 183 fertilized by self- and outcrossed-conspecific pollen can develop seeds whereas those  
 184 fertilized by heterospecific pollen produce no seeds. A cost of selfing relative to  
 185 outcrossing is also assumed as follows. In  $sp_i$ , all outcrossed ovules develop sound seeds  
 186 whereas selfed ovules set seeds at the rate of  $1 - I_{i,t}$ , where  $I_{i,t}$  ( $0 \leq I_{i,t} \leq 1$ ) is the



187 strength of inbreeding depression at generation  $t$  in  $sp_i$ . Here,  $I_{i,t}$  is described as a  
188 function of the population's selfing rate at the  $(t - 1)$ th generation of  $sp_i$ ,  $S_{i,t-1}$ :

189 
$$I_{i,t} = \beta e^{-\alpha S_{i,t-1}}.$$

190  $S_{i,t-1}$  is calculated as total number of selfed sound seeds divided by total number of  
191 sound seeds in  $sp_i$  in the last generation.  $I_{i,t}$  can be interpreted as an evolutionary  
192 variable, which decreases with an increase in the population's selfing rate in the parental  
193 generation owing to the accumulation–purging balance of deleterious mutations  
194 (Schemske & Lande, 1985; Husband & Schemske, 1996; Crnokrak & Barrett, 2002).

195 The coefficient  $\alpha$  expresses how inbreeding depression steeply decreased with  
196 increasing the population's selfing rate whereas the intercept  $\beta$  ( $0 \leq \beta \leq 1$ ) indicates the  
197 level of inbreeding depression when complete outcrossing occurs in the population. We  
198 simulated various  $\alpha$  and  $\beta$  values to test various scenarios in the eco-evolutionary  
199 dynamics of population size and selfing rate.

200 As the final process,  $K$  seedlings from all seeds produced by both species are  
201 randomly selected and construct generation  $t + 1$ . We assume no interspecific  
202 differences in competitive ability at germination and establishment processes as well as  
203 other ecological and genetic features:  $c_h$ ,  $\alpha$ , and  $\beta$  are also equal for both  $sp_1$  and  $sp_2$ . In  
204 addition, our model has no spatial structure.

205

### 206 *Inheritance and mutation of the rate of prior autonomous selfing*

207 To describe the evolutionary dynamics of prior autonomous selfing, our model assumes  
208 that the prior selfing rate of individual  $j$  in the next generation  $r_{i,j,t+1}$  is determined as  
209 the parental average. Thus, the prior selfing rate is assumed to be a quantitative genetic  
210 trait value which can be influenced by various quantitative traits such as the degrees of

211 herkogamy and/or dichogamy and the proportion of cleistogamous flowers (Culley &  
212 Klooster, 2007; Kalisz et al., 2012). In addition,  $r_{i,j,t+1}$  can be mutated to be slightly  
213 lower or higher than the parental mean (a random value between  $-\sigma$  and  $+\sigma$  is added to  
214 the parental mean) with a probability  $\mu$ .  $\mu$  and  $\sigma$  are the rate and effect size of mutation,  
215 respectively. We used 0.05 and 0.1 for  $\mu$  and  $\sigma$  as default values, respectively. If mutated  
216  $r_{i,j,t+1}$  becomes larger than 1 or smaller than 0, we use the values 1 and 0, respectively.

217

### 218 *Simulation settings and categorization of eco-evolutionary consequence*

219 To explore conditions for the coexistence of the two species, we examined the effects of  
220 pollinator availability ( $P$ ) and inbreeding depression-selfing rate relationship ( $\alpha$  and  $\beta$ )  
221 on the consequences of evolution. We tested two following scenarios for inbreeding  
222 depression-selfing rate relationship.  $I_{i,t}$  is fixed ( $\alpha = 0$ ;  $\beta = 0.1, 0.3, 0.5, 0.7$  or  $0.9$ ) or  
223 it varies in concert with the population's selfing rate ( $\alpha = 0, 0.5, 1, 2, 4$  or  $8$ ;  $\beta = 0.9$ ),  
224 with the whole parameter range of  $0 \leq P \leq 1$  (Table 1). In each simulation run, the  
225 initial numbers of individuals for both species are equal as  $K/2$ . The initial autonomous  
226 selfing rates for individuals were generated randomly with normal distribution whose  
227 mean and standard deviation are  $r_{\text{initial}} (1/2)$  and  $sd_{\text{initial}} (1/6)$  for both species. Each run  
228 continues for 2,000 generations or until either species goes extinct.

229         After 50 simulation runs for each parameter setting, we classified the eco-  
230 evolutionary dynamics into four categories based on ecological and evolutionary status  
231 of the species. When the simulation terminated by the extinction of either species and  
232 the population mean of prior autonomous selfing rate in survivors was higher or lower  
233 than 0.5, the result was categorized as (1) competitive exclusion by selfer or (2) that by  
234 outcrosser, respectively. Meanwhile, the runs in which the two species still coexisted at

235 the 2,000th generation were also divided into two categories, (3) a coexistence with  
236 evolutionary rescue by prior selfing and (4) a coexistence with neutral dynamics, based  
237 on following procedures.

238 To detect the evolutionary rescue, we calculated the population growth rate and  
239 selection gradient in each generation of  $sp_i$ . Population growth rate ( $W_{i,t}$ ) for the  $t$ -th  
240 generation is calculated as  $Kq_{i,t+1}/Kq_{i,t}$  ( $= q_{i,t+1}/q_{i,t}$ ). For clarifying the selection  
241 gradient on the prior selfing rate, we identified seed and pollen parents of all seeds and  
242 calculate a correlation coefficient between selfing rate  $r_{i,j,t}$  and seeding and siring  
243 success of each individual as the selection gradient ( $G_{i,t}$ ) at the  $t$ -th generation. The  
244 positive (or negative)  $G_{i,t}$  means that the higher (or lower) rate was adaptive at the  
245 generation in  $sp_i$ . Then, the evolutionary rescue by prior selfing is defined as a state  
246 following two conditions are satisfied simultaneously: (1) a significant negative  
247 correlation between  $q_{i,t}$  and  $G_{i,t}$  (i.e., a population decline facilitates the evolution of  
248 selfing), (2) a significant positive correlation between the population mean of prior  
249 selfing rate  $\sum_{j=1}^{Kq_{i,t}} r_{i,j,t}/Kq_{i,t}$  and  $W_{i,t}$  (i.e., the evolution of selfing increases  
250 population growth). Significances of these two correlations were examined by a  
251 permutation test. We permuted the variables of the last 500 generations in each run  
252 10,000 times and made null distribution and the 95% prediction interval of each  
253 correlation to test the significance of the value of the run. When both or either of the  
254 correlation coefficients were not significant, the run was categorized into the  
255 coexistence with neutral dynamics (Fig. 1).

256 We compared difference in long-term stability between coexistences with  
257 neutral dynamics and evolutionary rescue. We selected a typical parameter set for each  
258 coexistence type:  $P = 0.4$ ,  $\alpha = 0.5$ ,  $\beta = 0.9$  for that with evolutionary rescue (ER set) and

259  $P = 0.1$ ,  $\alpha = 4$ ,  $\beta = 0.9$  for coexistence with neutral dynamics (ND set). For each  
260 parameter set, we conducted 200 simulations for 10,000 generations and recorded the  
261 generation until which two species coexisted.

262 We also checked how simulation results change depending on the strength of  
263 reproductive interference and the initial population's mean selfing rate. We examined  
264 simulations in which  $c_h$  ( $= 0.0, 0.25, 0.5, 0.75$  or  $1.0$ ) and  $r_{\text{initial}}$  ( $= 0.0, 0.25, 0.5, 0.75$  or  
265  $1.0$ ) varied with the above parameter settings (ER and ND sets) and run 50 simulations  
266 for each parameter set. Moreover, to check the population dynamics of the two species  
267 with the fixed population's prior selfing rates, we conducted simulation runs in which  
268  $sp_1$  and  $sp_2$  had the same or different fixed prior selfing rates ( $0 \leq r_{\text{initial}} \leq 1$ ) with the  
269 same two parameter settings (ER and ND sets). Finally, we run simulations with the  
270 fixed abundance of two species to examine the effect of fixed population size on the  
271 evolution of prior selfing rate in the two parameter settings (ER and ND sets).

272

## 273 **Results**

### 274 *Eco-evolutionary dynamics with fixed inbreeding depression*

275 We found that lower pollinator availability preferred the evolution of higher selfing rate  
276 in both species, often promoting their coexistence with neutral dynamics (Fig. 2).  
277 Conditions for the coexistence with neutral dynamics was more limited by higher  
278 inbreeding depression (Fig. 2). The coexistences with neutral dynamics were always  
279 realized when the two species evolved the prior selfing rate close to 1.0, which  
280 neutralized their mutual reproductive interference (Fig. 1). During the coexistence,  
281 population dynamics of both species exhibited a random walk. Therefore, the  
282 coexistence with neutral dynamics is not stable in the long term and the extinction of

283 either species occurred when simulations continued for more generations (see the  
284 section below, *Long-term stability of the coexistences*). Meanwhile, when either or both  
285 of  $I$  and  $P$  are large, the eco-evolutionary dynamics tended to be terminated by  
286 competitive exclusion (Fig. 2). Especially when both of  $I$  and  $P$  are large, competitive  
287 exclusion by outcrosser always terminated the eco-evolutionary dynamics (Fig. 2). The  
288 coexistence with evolutionary rescue rarely occurred when the inbreeding depression  
289 was fixed and independent of the population's selfing rate (Fig. 2).

290

### 291 *Eco-evolutionary dynamics with variable inbreeding depression*

292 In the scenarios with variable inbreeding depression, conditions for both types of  
293 coexistence were more relaxed compared to those assuming fixed inbreeding depression  
294 (Figs. 2, 3). Interestingly, conditions with intermediate levels of pollinator availability  
295 and the slope of inbreeding depression function  $\alpha$  more frequently facilitated the  
296 coexistence with evolutionary rescue or neutral dynamics than other conditions (Fig. 3).

297 When inbreeding depression sharply decreases as the population's selfing rate  
298 increases ( $\alpha \geq 4.0$ ), competitive exclusion by selfer occurred in wider conditions as in  
299 those with lower fixed inbreeding depression ( $\alpha = 0$  and  $\beta = 0.1$  or  $0.3$ ; Figs. 2, 3).

300 Meanwhile, when inbreeding depression more gently decreased with increasing the  
301 population's selfing rate ( $\alpha = 0.5$ ), competitive exclusion by outcrosser tended to occur  
302 in the presence of higher pollinator availability like in the cases both of  $I$  and  $P$  are large  
303 in fixed inbreeding depression scenario.

304

### 305 *Long-term stability of the coexistences with neutral dynamics and evolutionary rescue*

306 The coexistence with evolutionary rescue continued until the 10,000-th generation if the  
307 fluctuations of the relative abundances ( $q_{i,t}$ ) and the prior selfing rates ( $r_{i,t}$ ) have once  
308 started, while the coexistence with neutral dynamics never coexisted before reaching the  
309 10,000-th generation (Fig. 4).

310

### 311 *Dependence of simulation consequences on $c_h$ and $r_{initial}$*

312 In the simulations with ER sets, we found that coexistence with evolutionary rescue  
313 nearly always occurred with high initial population's selfing rate ( $r_{initial} \geq 0.75$ ) and  
314 presence of mutual reproductive interference ( $c_h > 0.0$ ). When the initial population's  
315 selfing rate was low ( $r_{initial} \leq 0.25$ ), the both types of coexistence rarely or very  
316 infrequently occurred in both the ER and ND sets (Fig. 5). Moreover, no competitive  
317 exclusion by outcrosser was found when the initial population's selfing rate was high  
318 ( $r_{initial} \geq 0.75$ ). Meanwhile, the strength of reproductive interference ( $c_h$ ) seems unlikely  
319 to largely influence the coexistence with neutral dynamics with the ND parameter  
320 setting. However, the coexistence of evolutionary rescue never occurred without mutual  
321 reproductive interference ( $c_h = 0.0$ ) with the ER set.

322

### 323 *Simulation consequences with fixed prior selfing rate and fixed population size*

324 We found that coexistence for 2,000 generations very rarely occurred when the prior  
325 selfing rates were fixed in the two species for the both parameter settings except when  
326 both species had the same and very high prior selfing rates (Fig. 6). Winners were  
327 always the species having higher prior selfing rates with the ND parameter set whereas  
328 winners were usually the species having the lower and higher prior selfing rates in the  
329 below and above areas of the line of  $r_2 = -r_1 + 0.6$ , respectively, with the ER set (Fig.

330 6). In the simulations with the fixed abundance of two species, the evolutionary shift to  
331 the higher prior selfing rate was favored only when the relative abundance of focal  
332 species was lower than 1/2 with the ER parameter set (Fig. 7). Meanwhile, under the  
333 ND set, very high prior selfing rate was always favored independent on their abundance  
334 (Fig. 7).

335

### 336 **Discussion**

337 Our model revealed that the evolution of prior selfing can promote the coexistence in  
338 the presence of mutual reproductive interference while the coexistence rarely occurred  
339 without the evolution of prior selfing (Figs. 2, 3, 6). In the variable inbreeding  
340 depression scenario (inbreeding depression decreases with an increase in the  
341 population's selfing rate), both types of coexistence tended to be more occurred than in  
342 the fixed inbreeding depression scenario when comparing same pollinator availability  
343 (Figs. 2, 3). Especially when the strength of inbreeding depression gently decreased and  
344 pollinator availability was intermediate level, the coexistence with evolutionary rescue  
345 often occurred and stably continued for very long-term (Figs. 3, 4).

346 Firstly, we discuss the processes enabling the coexistence with evolutionary  
347 rescue in our model (Fig. 1). At the early generations, the stochastic process makes  
348 slight difference in population size and selfing rate between the two species and  
349 reproductive interference by more abundant species with higher selfing rate enlarge the  
350 difference. In such a situation, low outcross success due to increased heterospecific  
351 pollen deposition facilitates the evolution of high prior selfing rate in the inferior  
352 species. This evolutionary shift toward high selfing rate improves the population growth  
353 rate via an increase in selfed seed production (i.e., evolutionary rescue by prior selfing

354 occurs) especially when inbreeding depression is weakened with increasing the  
355 population's selfing rate in the inferior species. Meanwhile, once becoming the  
356 dominant species, reproductive interference from the competitor is getting weaker so  
357 that inbreeding depression favors lower prior selfing rate in the species. Lower prior  
358 selfing rate, in turn, can reduce total seed production of the population when pollinator  
359 availability is not high, leading to lower population growth rate compared to the  
360 competitor. This relative-abundance-dependent selection on the prior selfing rate  
361 promotes a negative relationship between and fluctuations of the prior selfing rate and  
362 population size through generations. Due to this out-of-phase fluctuations occurring  
363 both in two species, the long-term coexistence of the two species is realized under  
364 mutual reproductive interference.

365         Here, suitable conditions for the coexistence with evolutionary rescue are  
366 discussed by comparing to empirical knowledge. Our simulation demonstrated that the  
367 coexistence with evolutionary rescue occurred with moderate pollinator limitation,  
368 variable and moderate levels of inbreeding depression, the relatively higher initial prior  
369 selfing rate and the presence of reproductive interference. High pollinator availability  
370 always favors competitive exclusion by either outcrosser or selfers depending on the  
371 level of inbreeding depression. In other words, the long-term coexistence under the  
372 reproductive interference requires pollinator limited conditions which are prevailing in  
373 wild flowering plants (Larson & Barrett, 2000). Gently variable inbreeding depression  
374 still function as the cost of selfing even when the population's selfing rate of given  
375 species is very high. While inbreeding depression due to deleterious recessive alleles are  
376 thought to be rapidly purged with increasing population's selfing rate, weak late acting  
377 inbreeding depression caused by weakly deleterious mutations and heterozygous



378 advantage due to overdominance cannot be purged even in predominantly selfing  
379 species (Charlesworth et al., 1990; Husband & Schemske, 1996; Crnokrak & Barrett,  
380 2002; Charlesworth & Wills, 2009). Additionally, although it may not be surprising, we  
381 found that higher initial prior selfing rate widens the possibility of the coexistence with  
382 evolutionary rescue (Fig. 5). The finding suggests that only a pair of predominantly  
383 selfing or of mixed-mating species can coexist stably under reproductive interference,  
384 being consistent with recent studies on the coexistence under mutual reproductive  
385 interference (Tokuda et al., 2015; Katsuhara & Ushimaru, 2019; Nishida et al.  
386 unpublished data). Without reproductive interference, this type of coexistence never  
387 occurred even when other parameter settings are suitable for the coexistence (Fig. 5).  
388 This result is very interesting and proposes that mutual reproductive interference can act  
389 the cost of outcrossing and promoting more selfing (Katsuhara & Ushimaru, 2019),  
390 likely making a fluctuation pattern in the prior selfing rate throughout the generation.

391         The coexistence with neutral dynamics was often found in conditions with  
392 lower pollinator availability and weak fixed or moderately variable inbreeding  
393 depression (Figs. 2, 3). In such conditions, the higher prior selfing rate evolves very  
394 quickly to be almost completely 1.0 in both species (Fig. 1), which should be free from  
395 the negative effect of reproductive interference from competitor. Both species exhibit  
396 population dynamics of neutral random walk (Hubbell, 2001; Chave, 2004) and coexist,  
397 so that stochastic events will stop this type of coexistence at some point in time (Fig. 4).  
398 In our model, this type of coexistence was usually found in the parameter conditions  
399 where competitive exclusion by selfer frequently occurred, suggesting that these  
400 consequence categories do not differ qualitatively (Figs. 2, 3, 5). The rate of  
401 evolutionary change in prior selfing rate differed between these categories and the

402 coexistence occurred when the high prior selfing rate evolved more rapidly in both  
403 species (Fig. 1). Many predominately selfing weeds usually coexist in human-disturbed  
404 habitats where pollinators are often limited (Baker, 1974), most likely being explained  
405 by this type of coexistence. Empirical studies have shown the evolutionary shift to  
406 higher prior selfing rate (often via reduction of herkogamy) can rapidly occurred under  
407 pollinator limitation (Roels & Kelly, 2011; Brys & Jacquemyn, 2012; Gravasi &  
408 Schiestl, 2017; Cheptou, 2019). To apply our results to selfing-species coexistence in  
409 the field, the rate of evolutionary change of the prior selfing rate and pollinator  
410 availability are better to be examined in future studies.

411         Under conditions with high pollinator availability and strong inbreeding  
412 depression, mutual reproductive interference causes very rapid competitive exclusion by  
413 outcrosser, being consistent with expectations in the previous works that considered no  
414 limitation in outcross gamete transfer (Fig. 1, 2, 3; Levin & Anderson, 1970; Kishi &  
415 Nakazawa, 2013). Besides, competitive exclusion by selfer is frequently occurred under  
416 conditions with weak inbreeding depression and/or low pollinator availability. The  
417 exclusion occurred more slowly comparing to the exclusion by outcrosser (Fig. 1). The  
418 difference was likely due to that reproductive interference no more reduced seed  
419 production in highly selfing species.

420         In both types of coexistence, co-evolutionary shifts to extremely high prior  
421 selfing rate (over 0.9) was necessary in both competing species (Fig. 1). Many previous  
422 empirical studies, however, reported coexistences of an extremely selfer and a related  
423 outcrosser (Fishman & Wyatt, 1999; Brys et al., 2016; Randle et al., 2018). This  
424 difference between the field observations and our results might be explained by in two  
425 possible mechanisms which are not assumed in our model. First, some kinds of

426 ecological differences, such as competitive ability for germination and strength of  
427 inbreeding depression, might exist between the study species, promoting the  
428 coexistence of species with different mating systems. Second, selfers in these studies  
429 always exhibited reduced floral attractiveness which minimized the negative effect of  
430 reproductive interference via receiving few pollinator visits (Fishman & Wyatt, 1999;  
431 Brys et al., 2016; Randle et al., 2018). Meanwhile, our model assumed only the rate of  
432 prior selfing was evolvable as in the previous model (Cheptou, 2019). Such an evolution  
433 of selfing floral syndrome could enable obligative selfers to coexist with outcrossing  
434 relatives. Some recent studies reported the mutual reproductive interference between  
435 two sympatrically growing mixed-mating species which have showy flowers with  
436 frequent pollinator visitations and traits promoting prior autonomous self-pollination  
437 (cleistogamous flowers in *Impatiens noli-tangere* and *I. textori*, Tokuda et al., 2015; bud  
438 pollination in *Commelina communis* and *C. c. f. ciliata*, Katsuhara & Ushimaru, 2019).  
439 The coexistences found in these study systems could be explained by prior-selfing  
440 mediated evolutionary rescue, which are predicted by our model. To test this possibility,  
441 monitoring of eco-evolutionary dynamics of these competing species in the fields will  
442 be required. Although the complete test will require much time and effort, to examine  
443 the relationships among population's selfing rate, inbreeding depression and relative  
444 abundance in the field should improve our understanding of co-evolutionary  
445 coexistence mechanisms without pollination niche partitioning as the first step.

446 In conclusion, our model successfully showed that the evolution of prior  
447 selfing could increase population growth rate of inferior species and consequently  
448 enable the long-term coexistence with evolutionary rescue. We successfully showed that  
449 evolutionarily variable inbreeding depression based on accumulation–purging balance

450 of deleterious mutations expand the possibility of coexistence and promote the long-  
451 term coexistence. The result suggests that genetic dynamics of inbreeding depression  
452 within a given species may largely influence dynamics of community where pollinator-  
453 mediated competition occurs. Finally, we propose new mechanisms explaining co-  
454 evolutionary coexistence of closely related species under mutual without any kinds of  
455 niche differentiation and spatial structures. The applicability and generality of the  
456 proposed mechanisms should be investigated empirically in future.

457

#### 458 **Acknowledgements**

459 This study was performed with support from a Grant-in-Aid for JSPS Fellows to  
460 K.R.K., JSPS KAKENHI (No. 16H04845, 17K15197, & 20K15876) and JSPS  
461 Overseas Research Fellowship to Y.T., JSPS KAKENHI (No. 19K22457 & 19K23768)  
462 to R.I. and JSPS KAKENHI (No. 16K07517 & 19K06855) to A. U. We are grateful to  
463 the following people for their very helpful comments: N. Ohmido, Y. Takami, T.  
464 Minamoto, S. Sugiura, M. K. Hiraiwa, H. S. Ishii and T. Y. Ida.

465

466 **Reference**

- 467 Barrett, S. C. H. (2002). Sexual interference of the floral kind. *Heredity*, 88, 154–  
468 159. doi: 10.1038/sj.hdy.6800020
- 469 Baker, H. G. (1974). The Evolution of Weeds. *Annual Review of Ecology and*  
470 *Systematics*, 5(1), 1–24. doi: 10.1146/annurev.es.05.110174.000245
- 471 Brys, R., & Jacquemyn, H. (2012). Effects of human-mediated pollinator  
472 impoverishment on floral traits and mating patterns in a short-lived herb: an  
473 experimental approach. *Functional Ecology*, 26, 189–197. doi: 10.1111/j.1365-  
474 2435.2011.01923.x
- 475 Brys, R., van Cauwenberghe, J., & Jacquemyn, H. (2016). The importance of  
476 autonomous selfing in preventing hybridization in three closely related plant species.  
477 *Journal of Ecology*, 104, 601–610. doi: 10.1111/1365-2745.12524
- 478 Burns, J. H., & Strauss, S. Y. (2011). More closely related species are more ecologically  
479 similar in an experimental test. *Proceedings of the National Academy of Sciences*,  
480 108, 5302–5307. doi: 10.1073/pnas.1013003108
- 481 Charlesworth, B., Charlesworth, D., & Morgan, M. T. (1990). Genetic loads and  
482 estimates of mutation rates in highly inbred plant populations. *Nature*, 347,  
483 380–382. doi: 10.1038/347380a0
- 484 Charlesworth, D., & Willis, J. H. (2009). The genetics of inbreeding depression. *Nature*  
485 *Reviews Genetics*, 10, 783–796. doi: 10.1038/nrg2664
- 486 Chave, J. (2004). Neutral theory and community ecology. *Ecology Letters*, 7, 241–  
487 253. doi: 10.1111/j.1461-0248.2003.00566.x
- 488 Cheptou, P.-O. (2019). Does the evolution of self-fertilization rescue populations or  
489 increase the risk of extinction? *Annals of Botany*, 123, 337–345. doi:

- 490 10.1093/aob/mcy144
- 491 Chesson, P. (2000). Mechanisms of Maintenance of Species Diversity. *Annual Review*  
492 *of Ecology and Systematics*, 31, 343–366.
- 493 Crnokrak, P., & Barrett, S. C. H. (2002). Perspective: Purging the Genetic Load: A  
494 Review of the Experimental Evidence. *Evolution*, 56, 2347–2358. doi:  
495 10.1111/j.0014-3820.2002.tb00160.x
- 496 Culley, T. M., & Klooster, M. R. (2007). The cleistogamous breeding system: A review  
497 of its frequency, evolution, and ecology in angiosperms. *The Botanical Review*,  
498 73, 1. doi: 10.1663/0006-8101(2007)73[1:TCBSAR]2.0.CO;2
- 499 de Waal, C., Anderson, B., & Ellis, A. G. (2015). Relative density and dispersion pattern  
500 of two southern African Asteraceae affect fecundity through heterospecific  
501 interference and mate availability, not pollinator visitation rate. *Journal of Ecology*,  
502 103, 513–525. doi: 10.1111/1365-2745.12358
- 503 Eckert, C. G., Kalisz, S., Geber, M. A., Sargent, R., Elle, E., Cheptou, P.-O., ... Winn,  
504 A. A. (2010). Plant mating systems in a changing world. *Trends in Ecology &*  
505 *Evolution*, 25, 35–43. doi: 10.1016/j.tree.2009.06.013
- 506 Fishman, L. (2000). Pollen Discounting and the Evolution of Selfing in *Arenaria*  
507 *Uniflora* (caryophyllaceae). *Evolution*, 54, 1558–1565. doi: 10.1111/j.0014-  
508 3820.2000.tb00701.x
- 509 Fishman, L., & Wyatt, R. (1999). Pollinator-Mediated Competition, Reproductive  
510 Character Displacement, and the Evolution of Selfing in *Arenaria uniflora*  
511 (Caryophyllaceae). *Evolution*, 53, 1723–1733. doi: 10.2307/2640435
- 512 Gervasi, D. D. L., & Schiestl, F. P. (2017). Real-time divergent evolution in plants  
513 driven by pollinators. *Nature Communications*, 8, 1–8. doi: 10.1038/ncomms14691

- 514 Goodwillie, C., Kalisz, S., & Eckert, C. G. (2005). The Evolutionary Enigma of Mixed  
515 Mating Systems in Plants: Occurrence, Theoretical Explanations, and Empirical  
516 Evidence. *Annual Review of Ecology, Evolution, and Systematics*, *36*, 47–79.
- 517 Goodwillie, C., & Ness, J. M. (2013). Interactions of hybridization and mating systems:  
518 A case study in *Leptosiphon* (Polemoniaceae). *American Journal of Botany*, *100*,  
519 1002–1013. doi: 10.3732/ajb.1200616
- 520 Gröning, J., & Hochkirch, A. (2008). Reproductive Interference Between Animal  
521 Species. *The Quarterly Review of Biology*, *83*, 257–282. doi: 10.1086/590510
- 522 Harder, L. D., Cruzan, M. B., & Thomson, J. D. (1993). Unilateral incompatibility and  
523 the effects of interspecific pollination for *Erythronium americanum* and *Erythronium*  
524 *albidum* (Liliaceae). *Canadian Journal of Botany*, *71*, 353–358. doi: 10.1139/b93-  
525 038
- 526 Huang, S.-Q., & Shi, X.-Q. (2013). Floral isolation in *Pedicularis*: how do congeners  
527 with shared pollinators minimize reproductive interference? *New Phytologist*, *199*,  
528 858–865. doi: 10.1111/nph.12327
- 529 Hubbell, S. P. (2001). *The Unified Neutral Theory of Biodiversity and Biogeography*.  
530 Princeton University Press, Princeton.
- 531 Husband, B. C., & Schemske, D. W. (1996). Evolution of the Magnitude and Timing of  
532 Inbreeding Depression in Plants. *Evolution*, *50*, 54–70. doi: 10.2307/2410780
- 533 Kalisz, S., Randle, A., Chaiffetz, D., Faigles, M., Butera, A., & Beight, C. (2012).  
534 Dichogamy correlates with outcrossing rate and defines the selfing syndrome in the  
535 mixed-mating genus *Collinsia*. *Annals of Botany*, *109*, 571–582. doi:  
536 10.1093/aob/mcr237
- 537 Kalisz, S., Vogler, D. W., & Hanley, K. M. (2004). Context-dependent autonomous self-

- 538 fertilization yields reproductive assurance and mixed mating. *Nature*, *430*,  
539 884–887. doi: 10.1038/nature02776
- 540 Karron, J. D., Jackson, R. T., Thumser, N. N., & Schlicht, S. L. (1997). Outcrossing  
541 rates of individual *Mimulus ringens* genets are correlated with anther–stigma  
542 separation. *Heredity*, *79*, 365–370. doi: 10.1038/hdy.1997.169
- 543 Katsuhara, K. R., & Ushimaru, A. (2019). Prior selfing can mitigate the negative effects  
544 of mutual reproductive interference between coexisting congeners. *Functional*  
545 *Ecology*, *33*, 1504–1513. doi: 10.1111/1365-2435.13344
- 546 Kishi, S., & Nakazawa, T. (2013). Analysis of species coexistence co-mediated by  
547 resource competition and reproductive interference. *Population Ecology*, *55*, 305–  
548 313. doi: 10.1007/s10144-013-0369-2
- 549 Larson, B. M. H., & Barrett, S. C. H. (2000). A comparative analysis of pollen  
550 limitation in flowering plants. *Biological Journal of the Linnean Society*, *69*, 503–  
551 520. doi: 10.1111/j.1095-8312.2000.tb01221.x
- 552 Levin, D. A., & Anderson, W. W. (1970). Competition for Pollinators between  
553 Simultaneously Flowering Species. *The American Naturalist*, *104*, 455–467.
- 554 Lloyd, D. G. (1992). Self- and Cross-Fertilization in Plants. II. The Selection of Self-  
555 Fertilization. *International Journal of Plant Sciences*, *153*, 370–380.
- 556 Lloyd, D. G., & Webb, C. J. (1986). The avoidance of interference between the  
557 presentation of pollen and stigmas in angiosperms I. Dichogamy. *New Zealand*  
558 *Journal of Botany*, *24*, 135–162. doi: 10.1080/0028825X.1986.10409725
- 559 Martin, N. H., & Willis, J. H. (2007). Ecological Divergence Associated with Mating  
560 System Causes Nearly Complete Reproductive Isolation Between Sympatric  
561 *Mimulus* Species. *Evolution*, *61*, 68–82. doi: 10.1111/j.1558-5646.2007.00006.x



- 562 May, R. M. (1974). *Stability and complexity in model ecosystems*. Princeton University  
563 Press, Princeton.
- 564 Mitchell, R. J., Flanagan, R. J., Brown, B. J., Waser, N. M., & Karron, J. D. (2009).  
565 New frontiers in competition for pollination. *Annals of Botany*, *103*, 1403–1413.  
566 doi: 10.1093/aob/mcp062
- 567 Moreira-Hernández, J. I., & Muchhala, N. (2019). Importance of Pollinator-Mediated  
568 Interspecific Pollen Transfer for Angiosperm Evolution. *Annual Review of Ecology,  
569 Evolution, and Systematics*, *50*, 191–217. doi: 10.1146/annurev-ecolsys-110218-  
570 024804
- 571 Nishida, S., Kanaoka, M. M., Hashimoto, K., Takakura, K.-I., & Nishida, T. (2014).  
572 Pollen–pistil interactions in reproductive interference: comparisons of heterospecific  
573 pollen tube growth from alien species between two native *Taraxacum* species.  
574 *Functional Ecology*, *28*, 450–457. doi: 10.1111/1365-2435.12165
- 575 Randle, A. M., Spigler, R. B., & Kalisz, S. (2018). Shifts to earlier selfing in sympatry  
576 may reduce costs of pollinator sharing. *Evolution*, *72*, 1587–1599. doi:  
577 10.1111/evo.13522
- 578 Roels, S. A. B., & Kelly, J. K. (2011). Rapid Evolution Caused by Pollinator Loss in  
579 *Mimulus Guttatus*. *Evolution*, *65*, 2541–2552. doi: 10.1111/j.1558-  
580 5646.2011.01326.x
- 581 Runquist, R. D. B., & Stanton, M. L. (2013). Asymmetric and frequency-dependent  
582 pollinator-mediated interactions may influence competitive displacement in two  
583 vernal pool plants. *Ecology Letters*, *16*, 183–190. doi: 10.1111/ele.12026
- 584 Runquist, R. D. B. (2012). Pollinator-mediated competition between two congeners,  
585 *Limnanthes douglasii* subsp. *rosea* and *L. alba* (Limnanthaceae). *American Journal of*

- 586 *Botany*, 99, 1125–1132. doi: 10.3732/ajb.1100588
- 587 Schemske, D. W., & Lande, R. (1985). The Evolution of Self-Fertilization and  
588 Inbreeding Depression in Plants. Ii. Empirical Observations. *Evolution*, 39, 41–52.  
589 doi: 10.1111/j.1558-5646.1985.tb04078.x
- 590 Sicard, A., & Lenhard, M. (2011). The selfing syndrome: a model for studying the  
591 genetic and evolutionary basis of morphological adaptation in plants. *Annals of*  
592 *Botany*, 107, 1433–1443. doi: 10.1093/aob/mcr023
- 593 Silvertown, J. (2004). Plant coexistence and the niche. *Trends in Ecology & Evolution*,  
594 19, 605–611. doi: 10.1016/j.tree.2004.09.003
- 595 Takakura, K.-I., Nishida, T., Matsumoto, T., & Nishida, S. (2008). Alien dandelion  
596 reduces the seed-set of a native congener through frequency-dependent and one-sided  
597 effects. *Biological Invasions*, 11, 973–981. doi: 10.1007/s10530-008-9309-z
- 598 Tokuda, N., Hattori, M., Abe, K., Shinohara, Y., Nagano, Y., & Itino, T. (2015).  
599 Demonstration of pollinator-mediated competition between two native *Impatiens*  
600 species, *Impatiens noli-tangere* and *I. textori* (Balsaminaceae). *Ecology and*  
601 *Evolution*, 5, 1271–1277. doi: 10.1002/ece3.1431
- 602 van der Niet, T., & Johnson, S. D. (2012). Phylogenetic evidence for pollinator-driven  
603 diversification of angiosperms. *Trends in Ecology & Evolution*, 27, 353–361. doi:  
604 10.1016/j.tree.2012.02.002
- 605 Webb, C. J., & Lloyd, D. G. (1986). The avoidance of interference between the  
606 presentation of pollen and stigmas in angiosperms II. Herkogamy. *New Zealand*  
607 *Journal of Botany*, 24, 163–178. doi: 10.1080/0028825X.1986.10409726
- 608 Whitton, J., Sears, C. J., & Maddison, W. P. (2017). Co-occurrence of related asexual,  
609 but not sexual, lineages suggests that reproductive interference limits coexistence.

610 *Proc. R. Soc. B*, 284, 20171579. doi: 10.1098/rspb.2017.1579

611

612 **Table 1.** List of parameters.

| Parameter             | Definition                                                                                                                 | Default value           |
|-----------------------|----------------------------------------------------------------------------------------------------------------------------|-------------------------|
| $r_{i,j,t}$           | The ratio of ovules fertilized via prior autonomous selfing in the $j$ -th individual of $sp_i$ at the $t$ -th generation. | 0-1                     |
| $q_{i,t}$             | Relative abundance of $sp_i$ at the $t$ -th generation                                                                     | 0-1                     |
| $P$                   | Pollinator availability                                                                                                    | 0-1                     |
| $c_h$                 | Strength of reproductive interference                                                                                      | 1                       |
| $\alpha$              | Slope of inbreeding depression function                                                                                    | 0, 0.5, 1, 2, 4, 8      |
| $\beta$               | Intercept of inbreeding depression function                                                                                | 0.1, 0.3, 0.5, 0.7, 0.9 |
| $\mu$                 | mutation rate                                                                                                              | 0.05                    |
| $\sigma$              | Effect size of mutation                                                                                                    | 0.1                     |
| $K$                   | Carrying capacity (number of individual plant)                                                                             | 2000                    |
| $n$                   | Number of ovules per individual plant                                                                                      | 200                     |
| $r_{\text{initial}}$  | Mean of initial prior autonomous selfing rate                                                                              | 0.5                     |
| $sd_{\text{initial}}$ | Standard deviation of initial prior autonomous selfing rate                                                                | 1/6                     |

613

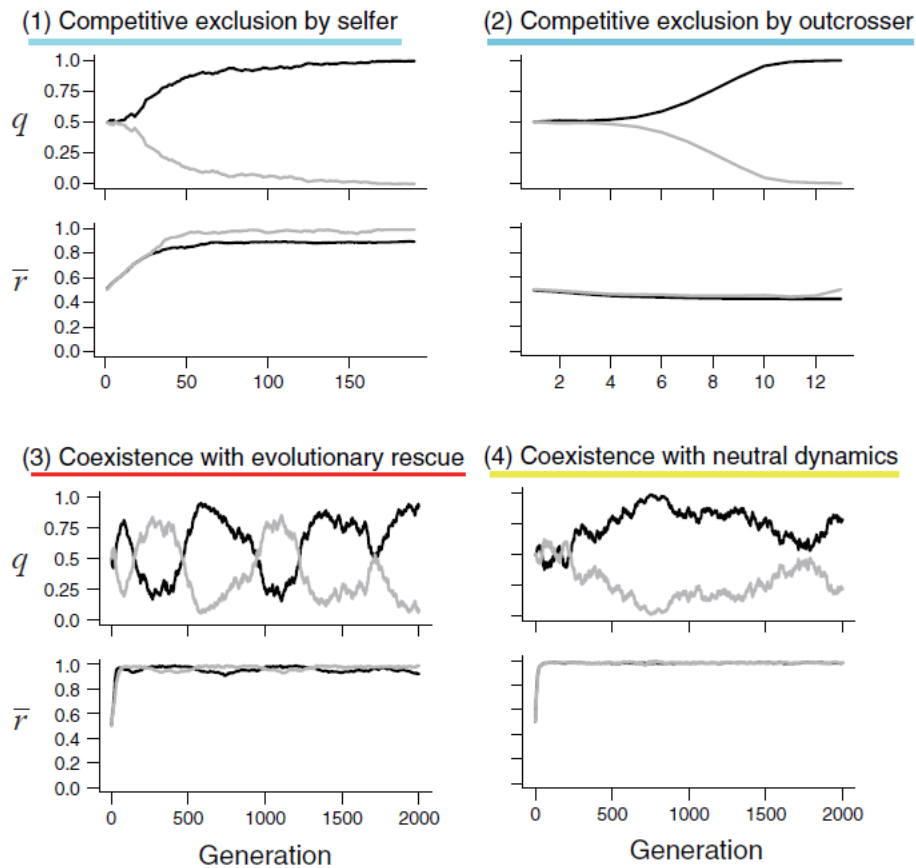

614

615 **Fig. 1.** Examples of four consequences of eco-evolutionary dynamics in our  
616 simulations: (1) competitive exclusion by selfer; (2) competitive exclusion by  
617 outcrosser; (3) coexistence with evolutionary rescue; (4) coexistence with neutral  
618 dynamics. Upper and lower graphs of each category show relative abundance and  
619 population mean of prior selfing rate dynamics of  $sp_1$  (black line) and  $sp_2$  (grey line),  
620 respectively.

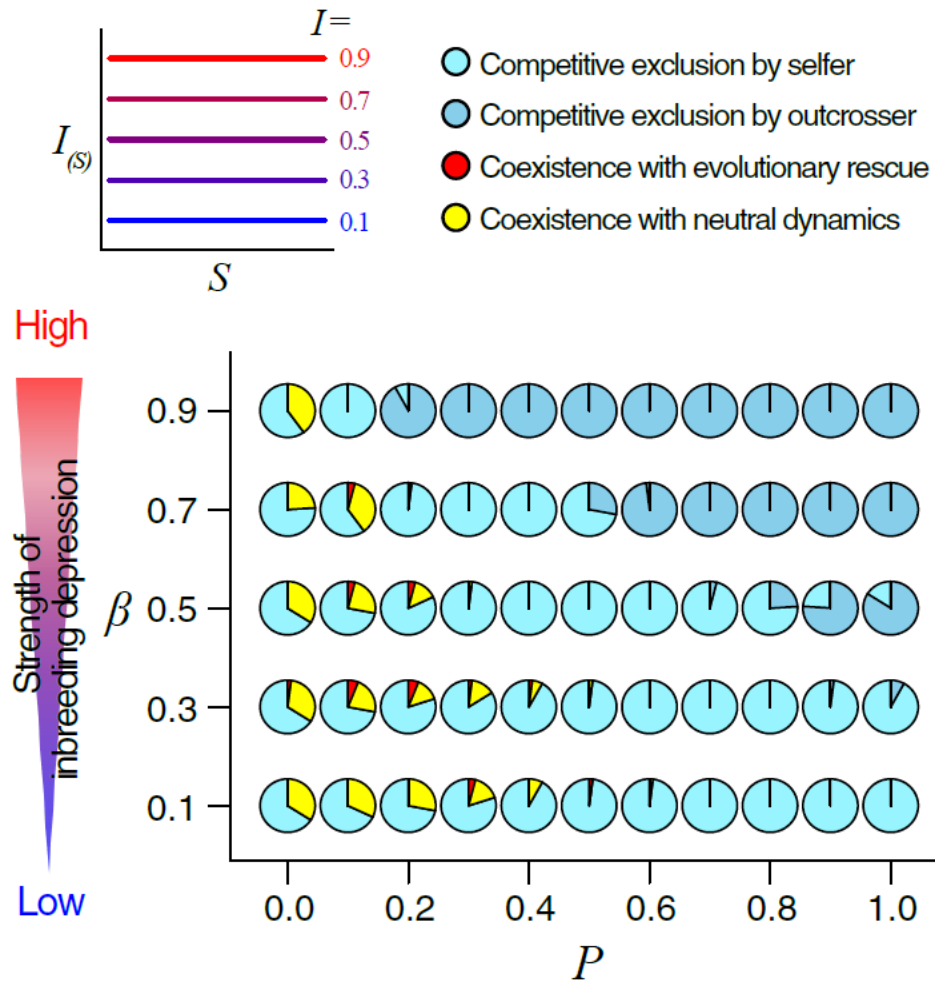

621

622 **Fig. 2.** Effects of pollinator availability and the strength of inbreeding depression on  
623 simulation consequence in fixed inbreeding depression scenarios. Each pie chat shows  
624 frequencies of four categories of eco-evolutionary consequences of 50 simulation runs  
625 (Fig. 1).

626

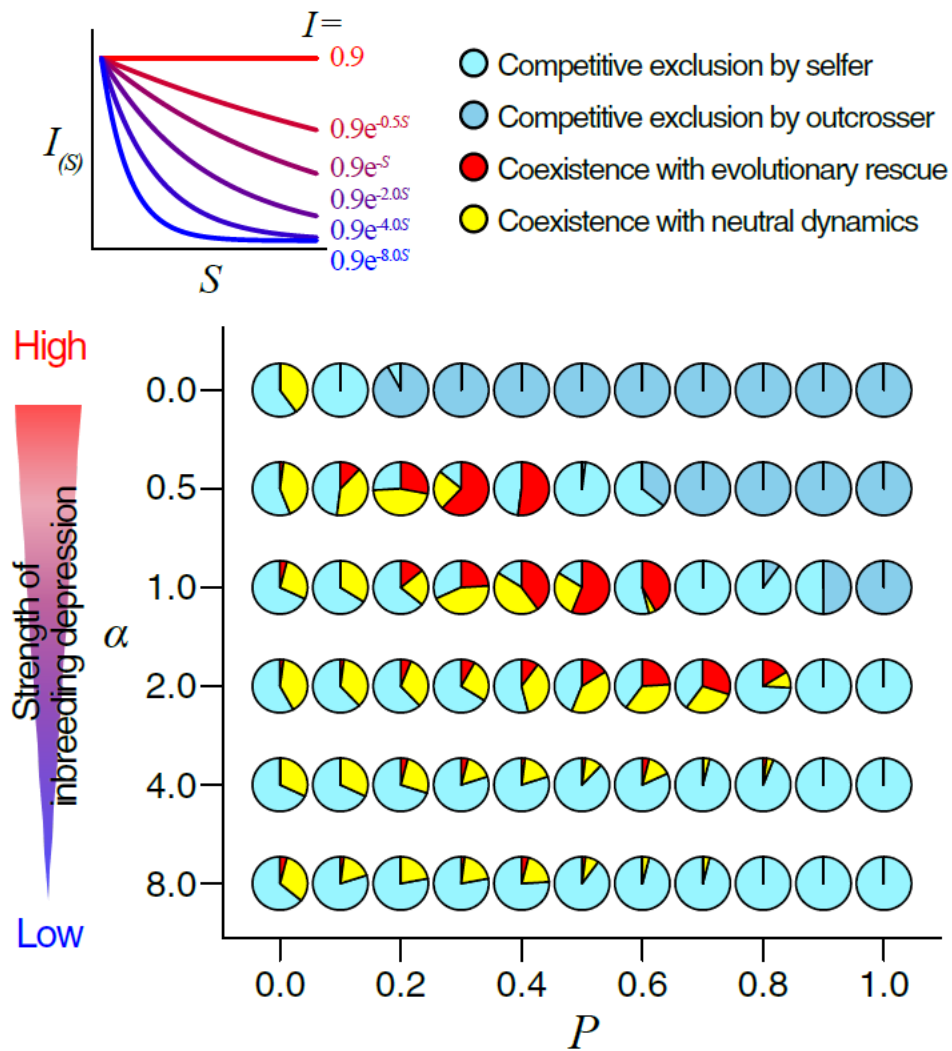

627

628 **Fig. 3.** Effects of pollinator availability and the strength of inbreeding depression on the  
629 simulation consequence in variable inbreeding depression scenarios. Each pie chat  
630 shows frequencies of four categories of eco-evolutionary consequences of 50 simulation  
631 runs (Fig. 1).

632

633

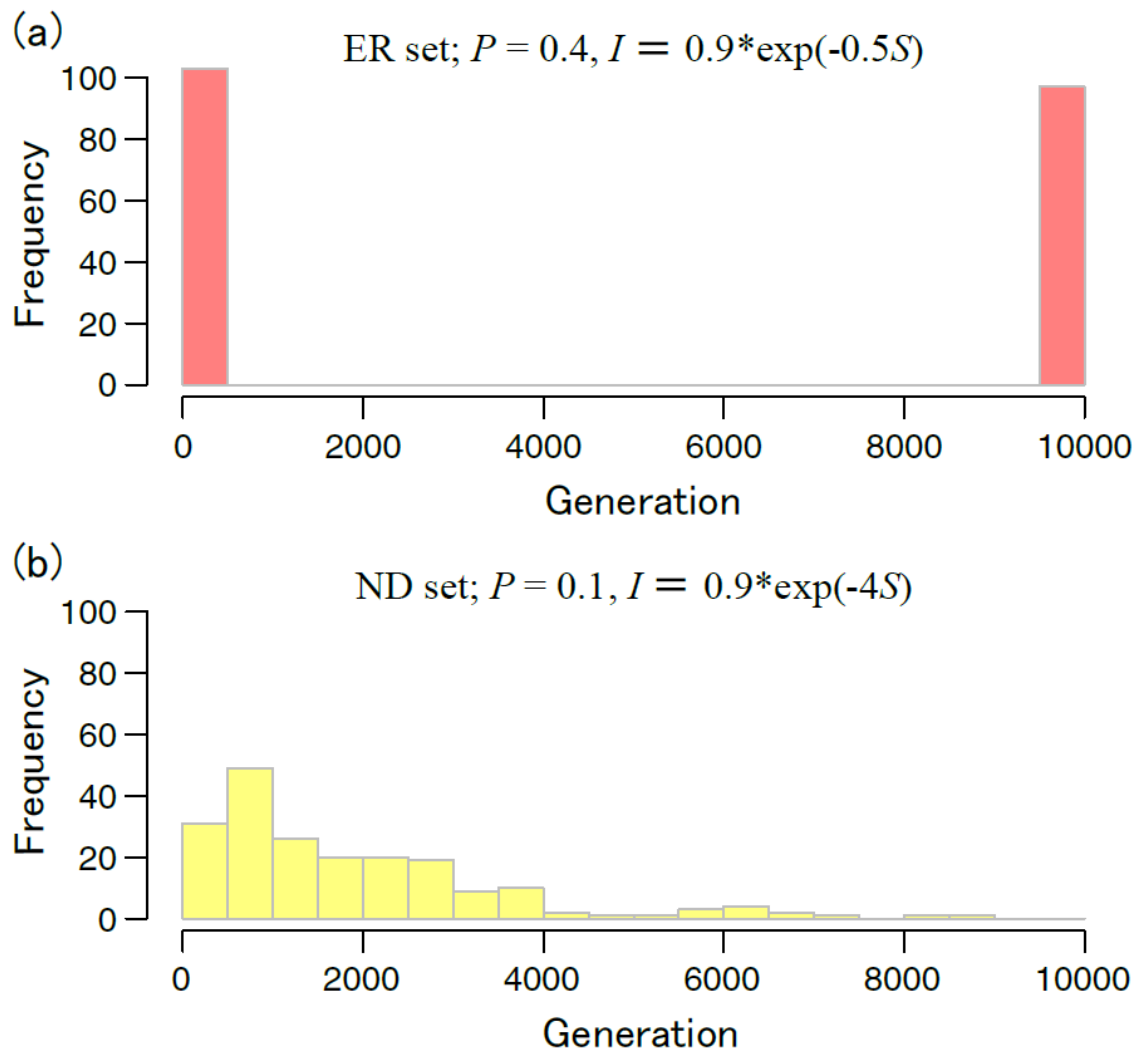

634

635 **Fig. 4.** Histograms of generation until when two species coexisted in two typical  
636 parameter sets for coexistences with evolutionary rescue (a, ER set) and with neutral  
637 dynamics (b, ND set), respectively. The graphs made from the outcomes of 200  
638 simulation runs.

639



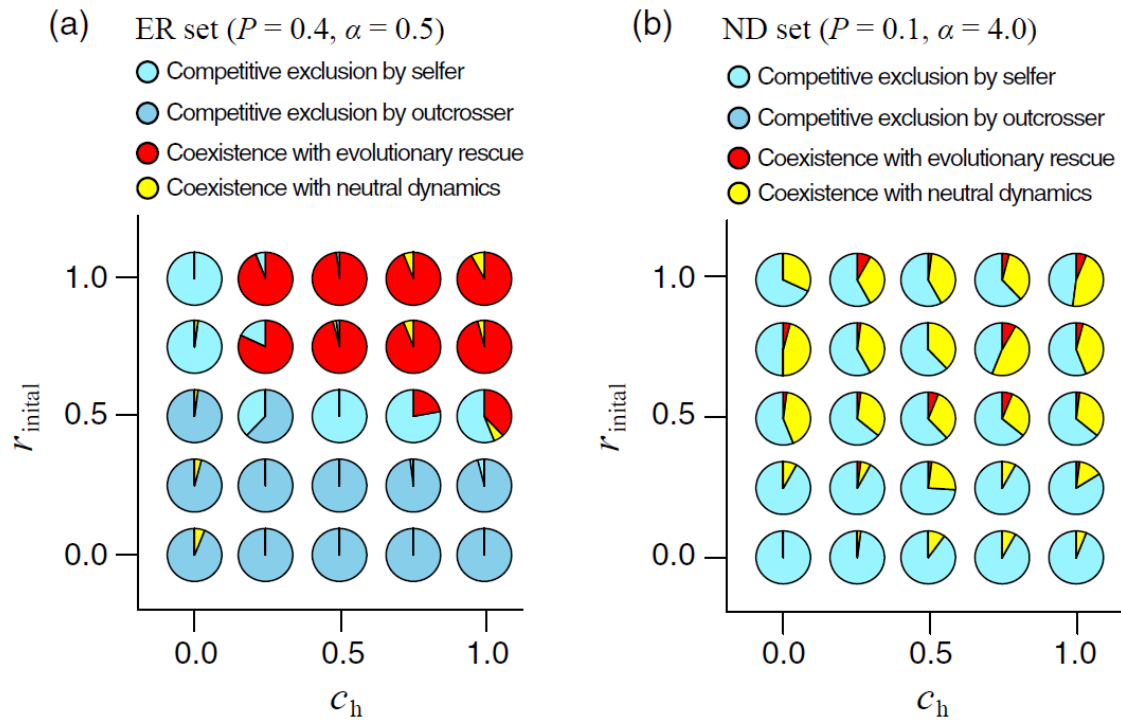

640

641 **Fig. 5.** Effects of strength of reproductive interference and initial population's mean  
642 selfing rate in two typical parameter sets for coexistences with evolutionary rescue (a, ER  
643 set) and with neutral dynamics (b, ND set), respectively. Each pie chat shows frequencies  
644 of four categories of eco-evolutionary consequences of 50 simulation runs (Fig. 1).

645

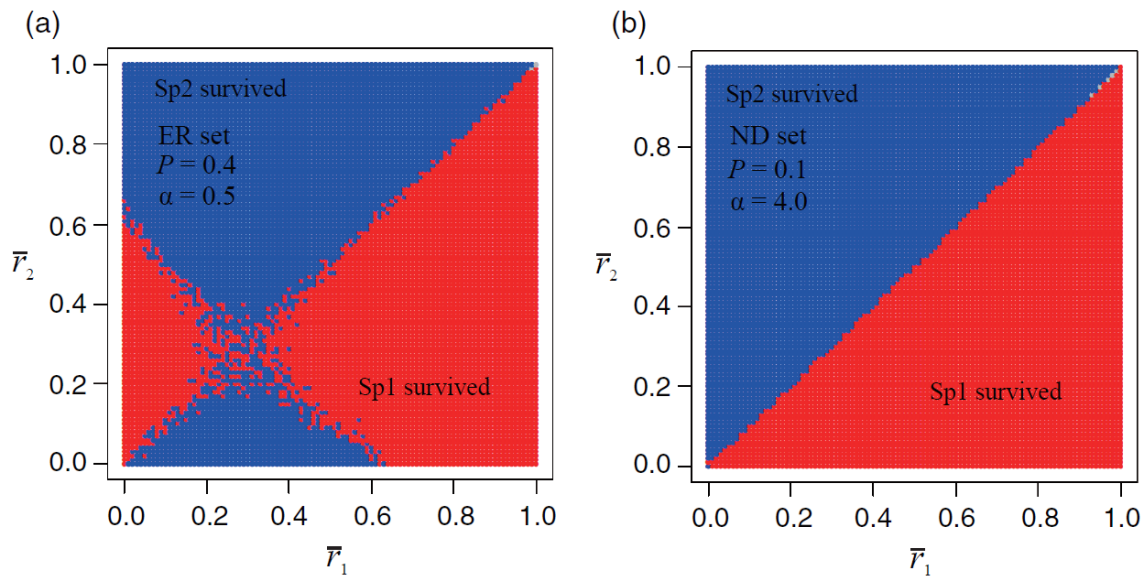

646

647 **Fig. 6.** Ecological consequences with fixed population's prior selfing rate in two typical  
648 parameter sets for coexistences with evolutionary rescue (a, ER set) and with neutral  
649 dynamics (b, ND set), respectively. X and Y axes indicate population's mean prior  
650 selfing rate of sp<sub>1</sub> and sp<sub>2</sub>, respectively. Blue and red areas mean that survivor is sp<sub>1</sub> and  
651 sp<sub>2</sub>, respectively, and grey regions (shown upper right corner of each panel) indicated  
652 that coexistence continued for 2,000th generations.

653

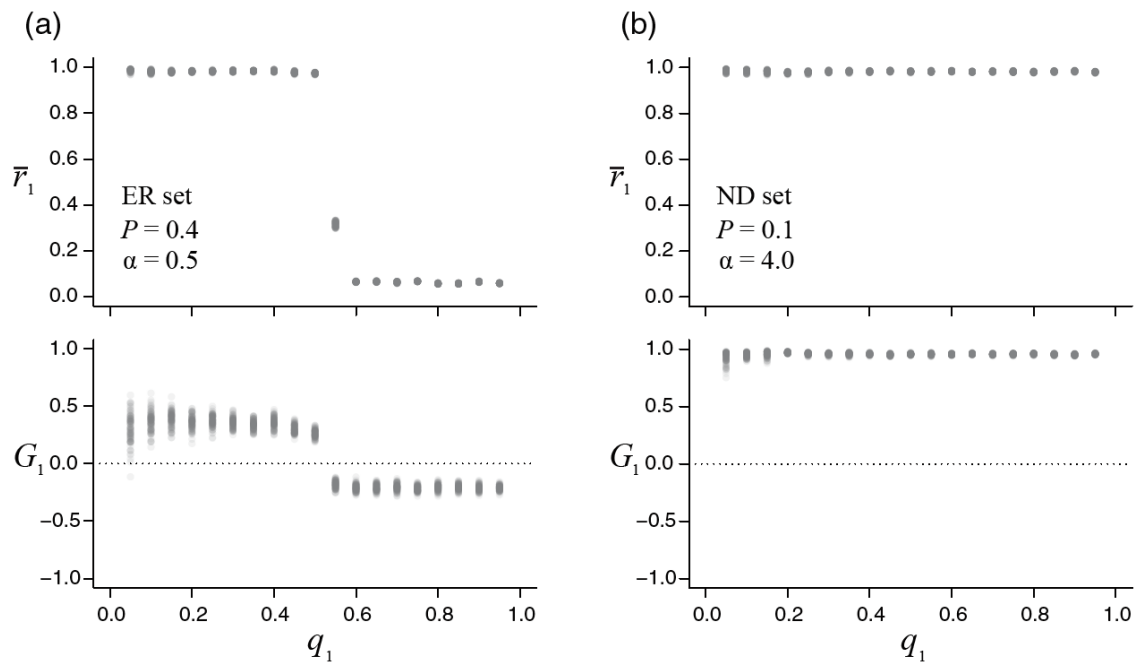

654

655 **Fig. 7.** Evolutionary consequences with fixed relative abundance in two typical parameter  
656 sets for coexistences with evolutionary rescue (a, ER set) and with neutral dynamics (b,  
657 ND set), respectively. Upper and lower graphs indicate the correlations between  
658 population's mean prior selfing rate and selection gradient, and relative abundance of the  
659 focal species in last 500 of 2,000 generations, respectively.

660
